# Supplementary material for: A Strong Immune Response in Young Adult Honeybees Masks Their Increased Susceptibility to Infection Compared to Older Bees
Source: PubMed Central journal article supplement (PMC3531495; doi:10.1371/journal.ppat.1003083), 2012-12-27
Supplement: ppat.1003083.s001.pdf [file ppat.1003083.s001.pdf]

expression levels ( $C_t^{-1}$ )

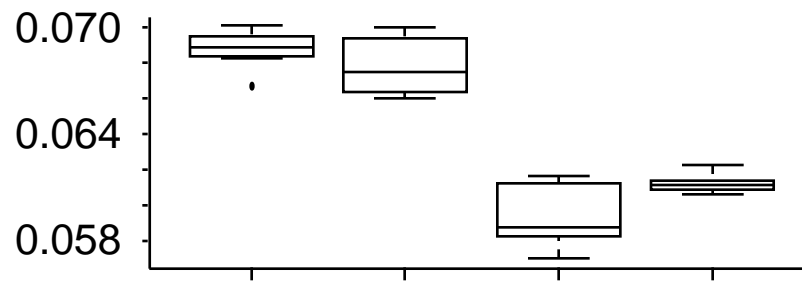

actin

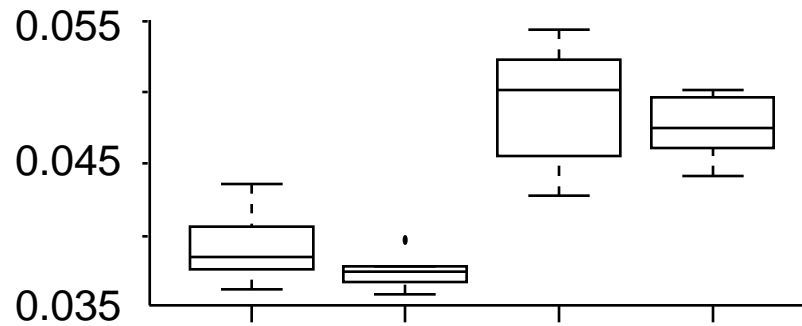

vitellogenin

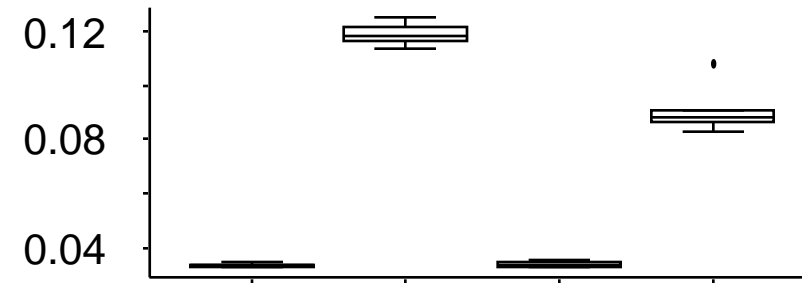

*M. anisopliae*

uninfected house bees  
infected house bees  
uninfected forager bees  
infected forager bees
