# Supplementary material for: A Strong Immune Response in Young Adult Honeybees Masks Their Increased Susceptibility to Infection Compared to Older Bees
Source: PubMed Central journal article supplement (PMC3531495; doi:10.1371/journal.ppat.1003083), 2012-12-27

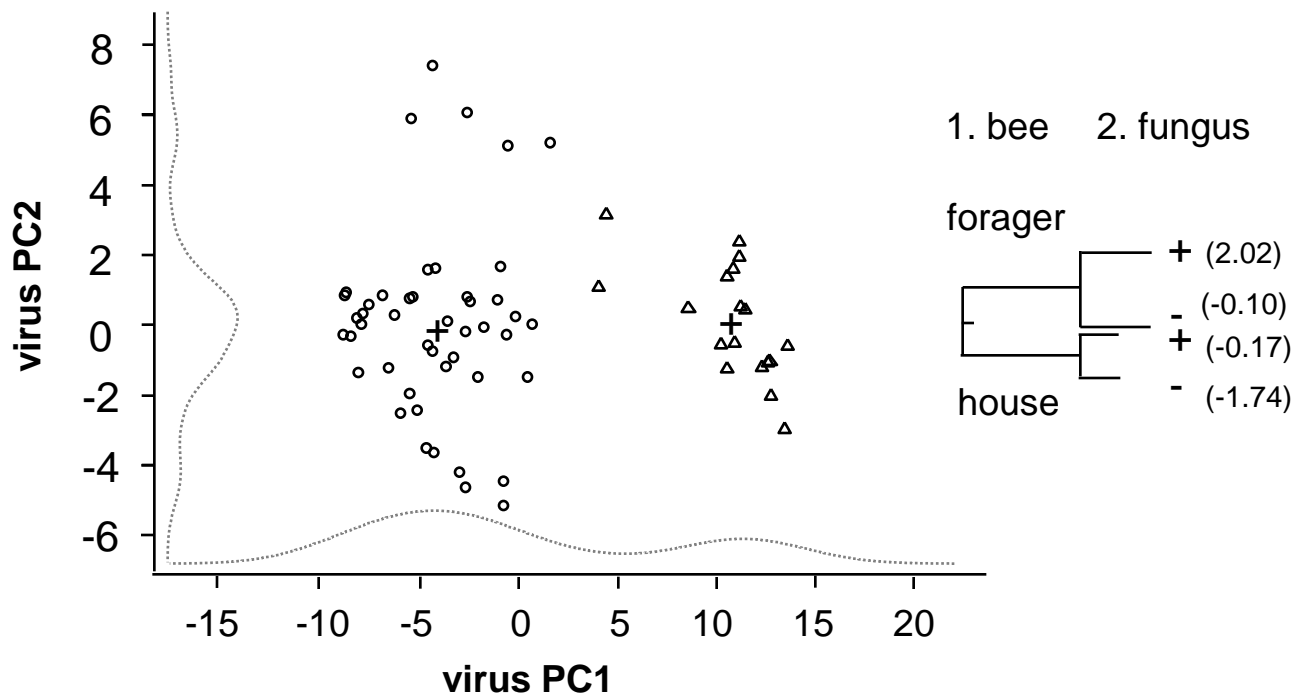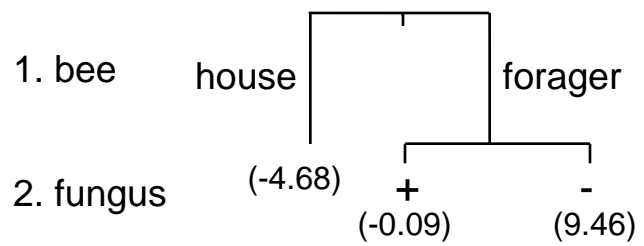

Supplement: ppat.1003083.s004.pdf [file ppat.1003083.s004.pdf]
