# Supplementary material for: A Strong Immune Response in Young Adult Honeybees Masks Their Increased Susceptibility to Infection Compared to Older Bees
Source: PLoS Pathog. 2012 Dec 27;8(12):e1003083. doi: 10.1371/journal.ppat.1003083 (PMC3531495; doi:10.1371/journal.ppat.1003083)
Supplement: Table S2 — Statistically significant ( p <1/ n ) differences in expression of immune related genes (based on previous homology assignments [34] ) between house and forager honeybees in response to treatment with M. anisopliae s.l. Numbers in table columns refer to fold change (log2) in gene expression. (PDF) [file ppat.1003083.s006.pdf]

**Table S2:** Statistically significant ( $p < 1/n$ ) differential expression of immune related genes (based on previous homology assignments [34] in house and forager honeybees treated with *M. anisopliae* s.l. Numbers in columns refer to fold change ( $\log_2$ ) in gene expression.

| Gene name     | Official name | Gene family / pathway | House bees            | Forager bees          | Controls (uninfected bees) |
|---------------|---------------|-----------------------|-----------------------|-----------------------|----------------------------|
|               |               |                       | uninfected → infected | uninfected → infected | House → forager            |
| abaecin       | GB18323       | AMP                   | <b>4.13</b>           |                       | <b>3.68</b>                |
| Defensin-2    | GB10036       | AMP                   | <b>4.97</b>           |                       |                            |
| Hymenoptaecin | GB17538       | AMP                   | <b>6.39</b>           |                       |                            |
| Hemolectin    | GB16711       | Cellular response     | <b>-0.44</b>          |                       |                            |
| Hemomucin     | GB20003       | Cellular response     |                       |                       | <b>0.55</b>                |
| CTL1          | GB11717       | C-lectin domain       |                       |                       | <b>-2.18</b>               |
| CTL2          | GB14265       | C-lectin domain       | <b>0.54</b>           | <b>-0.47</b>          | <b>0.98</b>                |
| CTL3          | GB18049       | C-lectin domain       |                       |                       | <b>-2.27</b>               |
| CTL4          | GB20122       | C-lectin domain       |                       |                       | <b>-2.11</b>               |
| CTL6          | GB11792       | C-lectin domain       |                       |                       | <b>-1.25</b>               |
| CTL7          | GB14975       | C-lectin domain       |                       |                       | <b>-1.84</b>               |
| CTL9          | GB15050       | C-lectin domain       |                       |                       | <b>-2.36</b>               |
| Angiopoietin  | GB17018       | Fibrinogen            | <b>0.61</b>           |                       | <b>-1.28</b>               |
| Scabrous      | GB11902       | Fibrinogen            | <b>0.37</b>           |                       | <b>0.67</b>                |
| B-gluc2       | GB19961       | GNBPs                 | <b>1.91</b>           |                       | <b>3.28</b>                |
| IGFn3-11      | GB12490       | IG Superfamily Genes  |                       |                       | <b>-1.51</b>               |
| IGFn3-15      | GB15344       | IG Superfamily Genes  |                       |                       | <b>-0.41</b>               |
| IGFn3-2       | GB11358       | IG Superfamily Genes  |                       | <b>0.52</b>           | <b>-1.49</b>               |
| IGFn3-7       | GB11846       | IG Superfamily Genes  |                       |                       | <b>-0.60</b>               |
| dUbc13        | GB19498       | IMD                   |                       |                       | <b>0.49</b>                |
| lap2          | GB11057       | IMD                   |                       |                       | <b>0.48</b>                |
| relish        | GB13742       | IMD                   | <b>0.58</b>           |                       |                            |
| Tab           | GB18650       | IMD                   | <b>-0.29</b>          |                       |                            |
| Tak1          | GB14664       | IMD                   | <b>-0.48</b>          |                       |                            |
| Domeless      | GB12159       | JakSTAT               | <b>0.91</b>           |                       |                            |
| D-PIAS        | GB18362       | JakSTAT               | <b>0.28</b>           |                       | <b>0.46</b>                |
| SOCS          | GB18949       | JakSTAT               | <b>0.23</b>           |                       |                            |
| RIP1          | GB11320       | MAPK                  | <b>0.50</b>           |                       |                            |
| NimA          | GB12883       | Phagocytosis          |                       |                       | <b>-0.88</b>               |
| NimB          | GB12454       | Phagocytosis          |                       |                       | <b>1.24</b>                |
| NimC2         | GB13979       | Phagocytosis          | <b>-1.18</b>          |                       |                            |
| PGRP-S1       | GB15371       | PGRP                  | <b>-1.22</b>          |                       | <b>1.23</b>                |
| PGRP-S2       | GB19301       | PGRP                  | <b>3.43</b>           |                       | <b>2.26</b>                |
| PGRP-S3       | GB17879       | PGRP                  | <b>-0.88</b>          |                       | <b>2.36</b>                |
| PPO           | GB18313       | PPO                   |                       |                       | <b>-1.76</b>               |

|                           |         |                                    |              |  |              |
|---------------------------|---------|------------------------------------|--------------|--|--------------|
| PPOAct / SP8              | GB18767 | PPO / serine protease              | <b>-1.70</b> |  |              |
| GRAAL/Tequila-like / SP23 | GB12538 | Scav. Receptor A / serine protease |              |  | <b>1.23</b>  |
| AmSCR-B10                 | GB19683 | Scav. Receptor B                   | <b>-0.63</b> |  |              |
| AmSCR-B8                  | GB16388 | Scav. Receptor B                   | <b>-0.73</b> |  |              |
| AmSCR-B9                  | GB19916 | Scav. Receptor B                   | <b>-0.69</b> |  | <b>0.67</b>  |
| AmSCR-C                   | GB19925 | Scav. Receptor C                   | <b>-1.68</b> |  |              |
| cSP1                      | GB16147 | serine proteases                   |              |  | <b>1.30</b>  |
| cSP2                      | GB14247 | serine proteases                   |              |  | <b>1.71</b>  |
| cSP7                      | GB17145 | serine proteases                   |              |  | <b>2.13</b>  |
| cSPH42                    | GB11298 | serine proteases                   |              |  | <b>1.26</b>  |
| SP16                      | GB12253 | serine proteases                   | <b>0.59</b>  |  |              |
| SP23                      | GB12538 | serine proteases                   |              |  | <b>1.23</b>  |
| SP24                      | GB14233 | serine proteases                   |              |  | <b>-0.68</b> |
| SP28                      | GB13489 | serine proteases                   |              |  | <b>2.66</b>  |
| SP34                      | GB11552 | serine proteases                   |              |  | <b>-5.71</b> |
| SP35                      | GB16021 | serine proteases                   |              |  | <b>2.15</b>  |
| SP38                      | GB16214 | serine proteases                   |              |  | <b>1.56</b>  |
| SP45                      | GB17654 | serine proteases                   | <b>-0.84</b> |  | <b>-1.22</b> |
| SP46                      | GB16367 | serine proteases                   | <b>0.64</b>  |  |              |
| SP49                      | GB15317 | serine proteases                   |              |  | <b>1.67</b>  |
| SP8                       | GB18767 | serine proteases                   | <b>-1.70</b> |  |              |
| SPH19                     | GB17345 | serine proteases                   | <b>-0.95</b> |  |              |
| TEP7                      | GB12605 | TEP                                |              |  | <b>1.21</b>  |
| cact-1                    | GB10655 | Toll/TLR                           |              |  | <b>0.41</b>  |
| cact-2                    | GB13520 | Toll/TLR                           |              |  | <b>0.81</b>  |
| dorsal-1A                 | GB19066 | Toll/TLR                           | <b>0.30</b>  |  |              |
| Dorsal-1B                 | GB19537 | Toll/TLR                           |              |  | <b>-0.63</b> |
| Mik2                      | GB14720 | Toll/TLR                           | <b>0.31</b>  |  |              |
| NEC LIKE                  | GB16472 | Toll/TLR                           | <b>1.69</b>  |  | <b>2.73</b>  |
| NEC LIKE                  | GB17012 | Toll/TLR                           | <b>-0.34</b> |  |              |
| NEC LIKE                  | GB19582 | Toll/TLR                           |              |  | <b>1.28</b>  |
| pelle                     | GB16397 | Toll/TLR                           |              |  | <b>0.44</b>  |
| PSH LIKE / CSP14          | GB14044 | Toll/TLR/ serine protease          | <b>0.67</b>  |  | <b>1.39</b>  |
| PSH LIKE / SP13           | GB15640 | Toll/TLR / serine protease         |              |  | <b>0.56</b>  |
| Toll (TLR)                | GB18520 | Toll/TLR                           | <b>0.81</b>  |  | <b>1.03</b>  |
